# Supplementary material for: Vaccine Inoculation Route Modulates Early Immunity and Consequently Antigen-Specific Immune Response
Source: PubMed Central journal article supplement (PMC8093451; doi:10.3389/fimmu.2021.645210), 2021-04-20
Supplement: DataSheet_1.pdf [file DataSheet_1.pdf]

## *Supplementary Material*

### **Vaccine inoculation route modulates early immunity and consequently antigen-specific immune response**

#### **Authors:**

Pierre Rosenbaum<sup>1,2</sup>, Nicolas Tchitchek<sup>1,2</sup>, Candie Joly<sup>1,2</sup>, André Rodriguez Pozo<sup>1,2</sup>, Lev Stimmer<sup>3,4</sup>, Sébastien Langlois<sup>1,2</sup>, Hakim Hocini<sup>2,5</sup>, Leslie Gosse<sup>1,2</sup>, David Pejoski<sup>1,2</sup>, Antonio Cosma<sup>1,2</sup>, Anne-Sophie Beignon<sup>1,2</sup>, Nathalie Dereuddre-Bosquet<sup>1,2</sup>, Yves Levy<sup>2,5</sup>, Roger Le Grand<sup>1,2</sup> and Frédéric Martinon<sup>1,2,\*</sup>

#### **Affiliations:**

<sup>1</sup>CEA – Université Paris-Saclay – INSERM U1184, Immunology of viral infections and autoimmune diseases, IDMIT Department, IBFJ, 92265 Fontenay-aux-Roses, France

<sup>2</sup>Vaccine Research Institute, Henri Mondor Hospital, 94010 Créteil, France

<sup>3</sup>INSERM, U1169, 94270 Kremlin-Bicêtre, France

<sup>4</sup>CEA – INSERM, MIRCen, UMS27, 92265 Fontenay-aux-Roses, France

<sup>5</sup>INSERM, U955, Team 16, Clinical and Infectious Diseases Department, Hospital Henri Mondor, University of Paris East, 94010 Créteil, France

#### **\*Corresponding author:**

Correspondence should be addressed to: Frédéric Martinon, CEA, 18 Route du Panorama, 92265 Fontenay-aux-Roses, France (frederic.martinon@cea.fr).

#### **Supplementary Materials:**

Fig. S1. Analysis pipeline of the CyTOF dataset.

Fig. S2. Overview of the kinetics of differentially enriched clusters.

Fig. S3. Gating strategies used in flow cytometry to study the early innate response in blood.

Fig. S4. Skin and lymph node tissue after MVA immunization by the SC or ID route

Fig. S5. Gating strategy for the flow cytometry of tissue samples.

Table S1: Panel used for CyTOF staining

Table S2: Panel used for FlowCytometry staining

Table S3: Dataset of innate immune response

**Fig. S1. Analysis pipeline of the CyTOF dataset.**

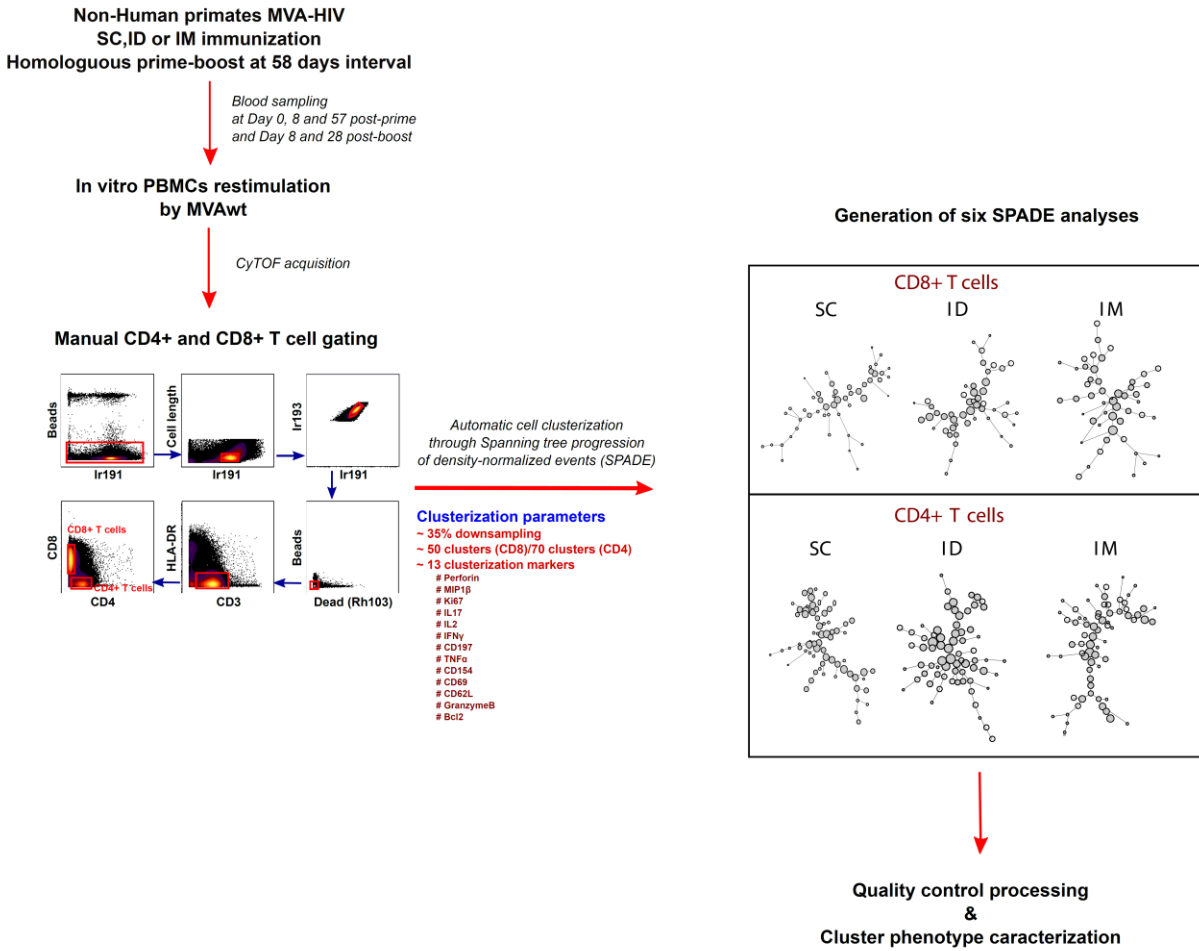

CyTOF analysis pipeline adapted from a previously developed method (43). For the three SPADE representations, each node represents a cell cluster and its size is proportional to the total number of cells in the cluster, regardless of animal or timepoint. For circular representations, each dot at the extremity represents a cell cluster and the group assignments (polyfunctional, cytotoxic, proliferative, migrating, or others) correspond to those shown in Fig. S1 and 2. Red links correspond to significant correlations between clusters of the same group. Gray links correspond to significant correlations between clusters of different groups (student t-test,  $p < 0.001$ ).

**Fig. S2. Overview of the kinetics of differentially enriched clusters**

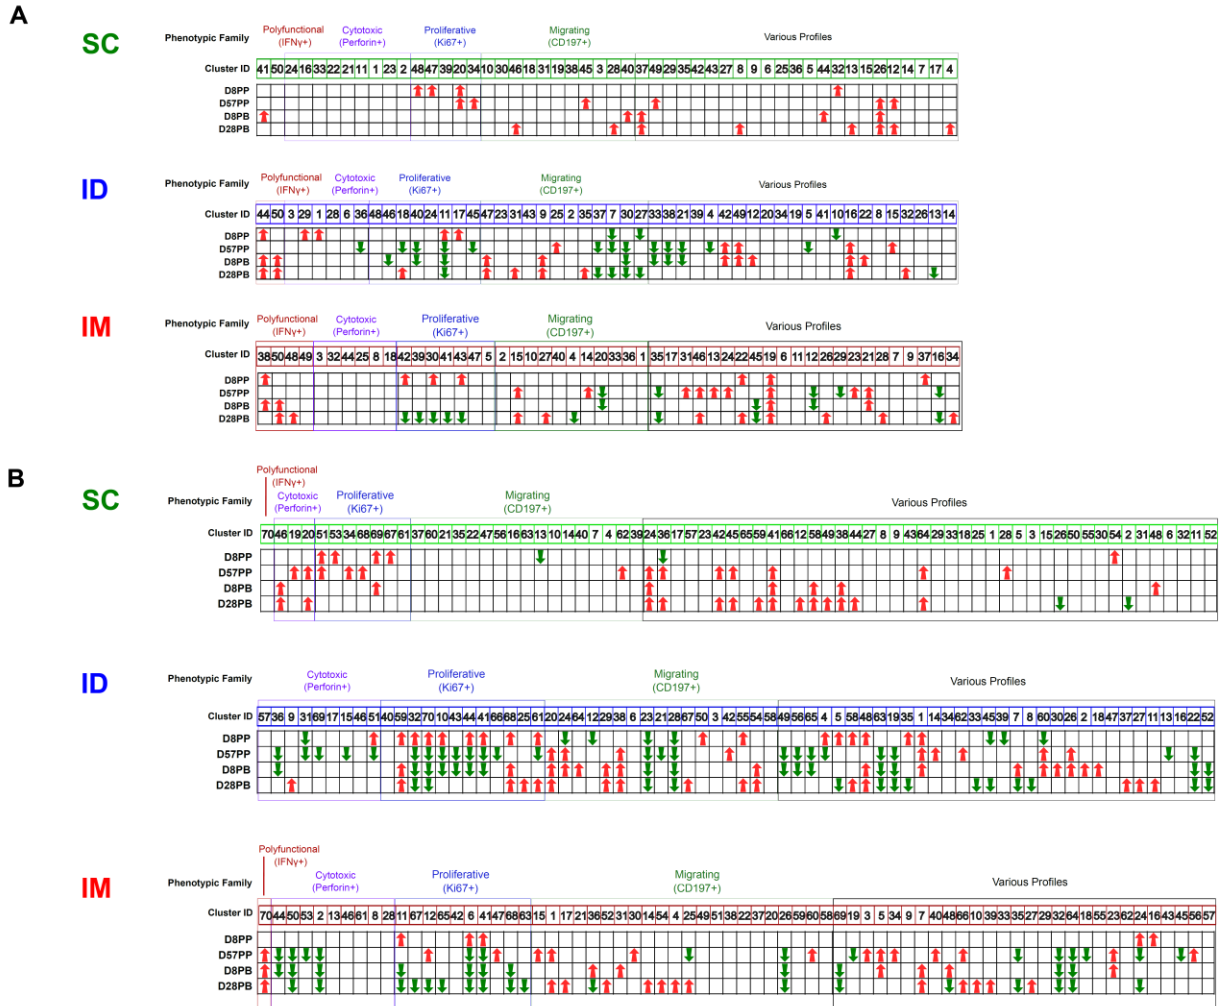

(A) CD8<sup>+</sup> T-cell clusters. (B) CD4<sup>+</sup> T-cell clusters. The upward-pointing red arrows indicate significant increases and the downward pointing green arrows depict significant decreases (t-test showing a p-value < 0.05, n = 4) in cell recruitment at the indicated timepoint relative to baseline.

**Fig. S3. Gating strategies used in flow cytometry to study the early innate response in blood.**

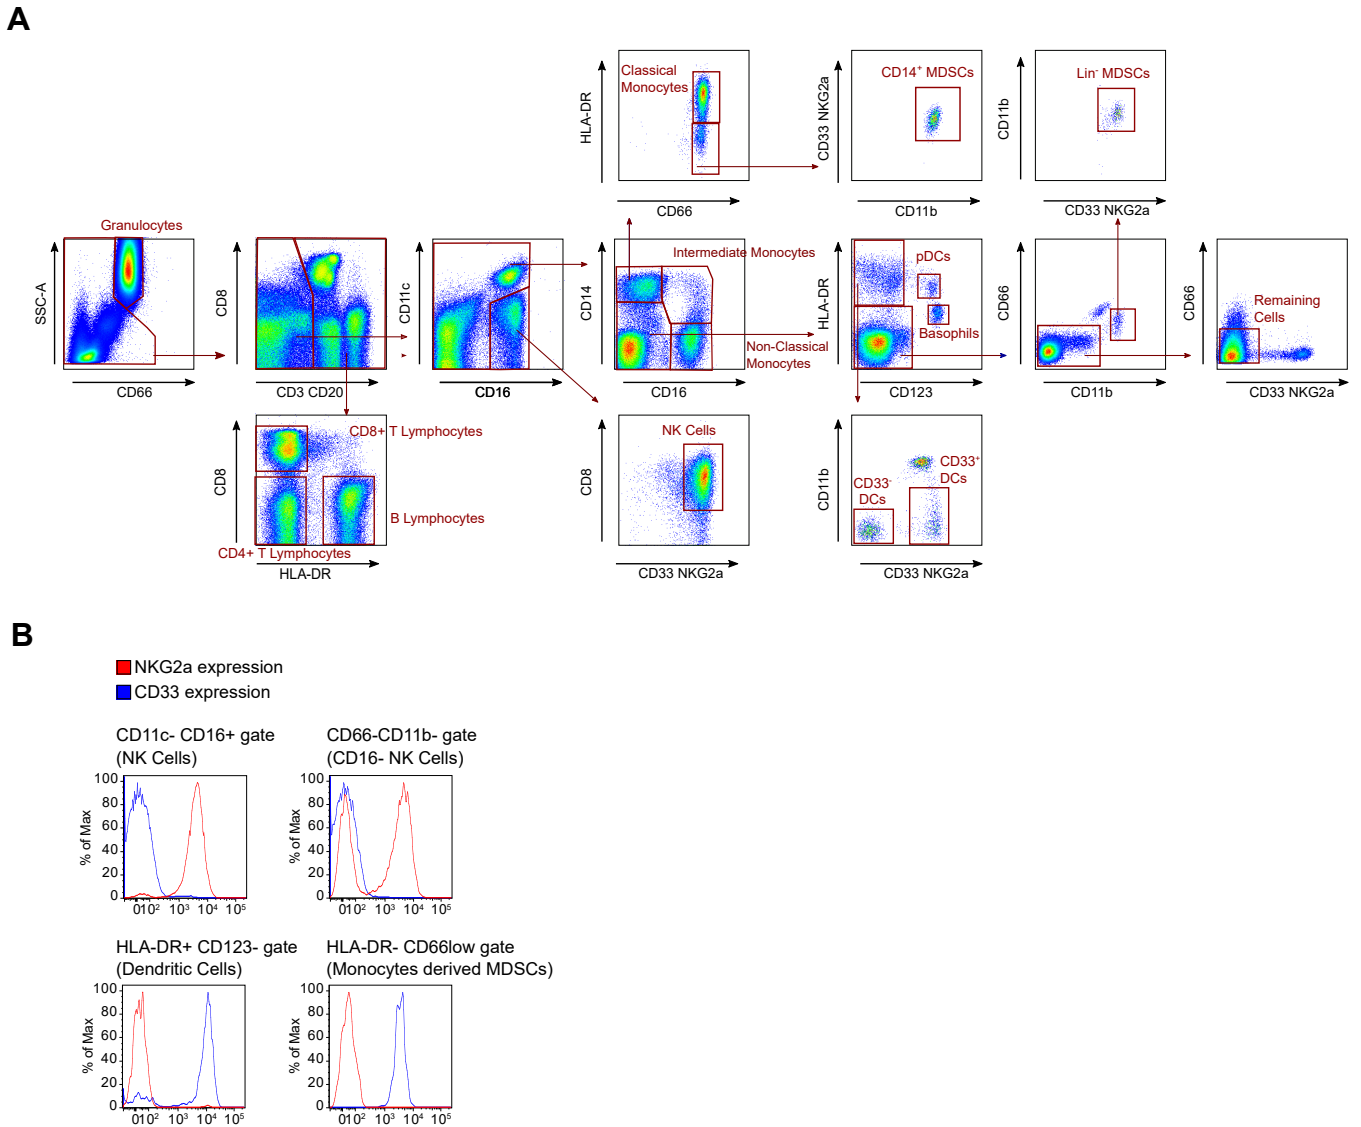

(A) Dot-plot representation of one representative experiment under conditions of inflammation.

(B) Histograms showing the exclusivity of the NKG2a and CD33 markers, justifying the choice of using the same fluorochrome for both markers in the staining panel.

**Fig. S4. Skin and lymph node tissue after MVA immunization by the SC or ID route.**

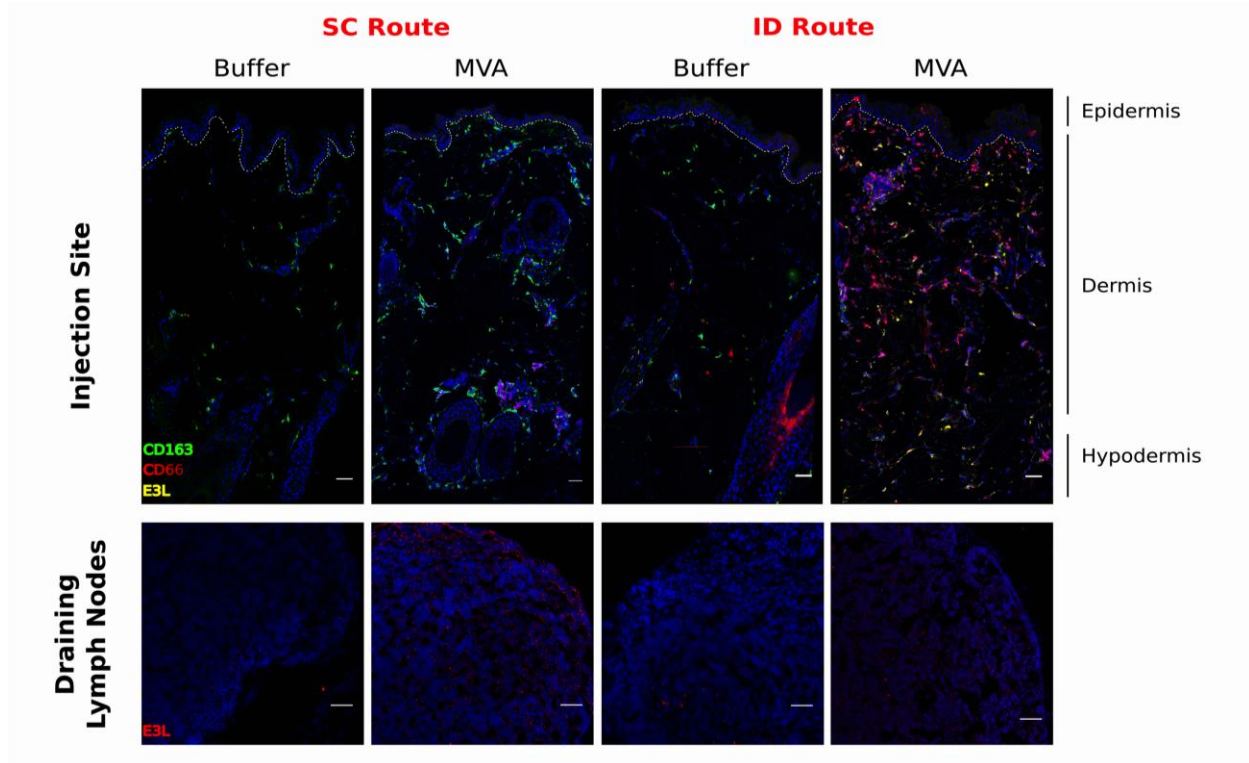

(A) Immunohistofluorescence of the injection site (skin and subcutaneous tissue) and draining inguinal lymph node, showing transversal sections of frozen cassettes 24 h after the injection of buffer or rMVA by the ID or SC route. The scale bar is equal to 50  $\mu\text{m}$ . For the injection site: CD163 in green, CD66 in red, and E3L in yellow. The white dotted line represents the interface between epidermis and dermis. For the lymph nodes, E3L is in red. One representative experiment of two is shown.

**Fig. S5. Gating strategy for the flow cytometry of tissue samples.**

**A**

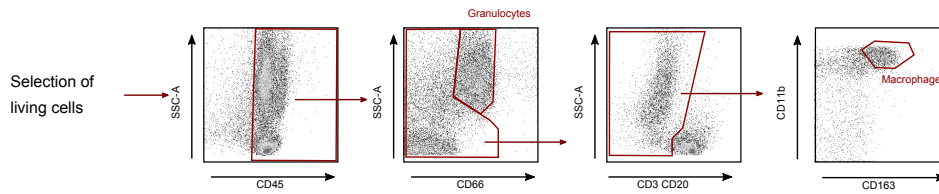

**B**

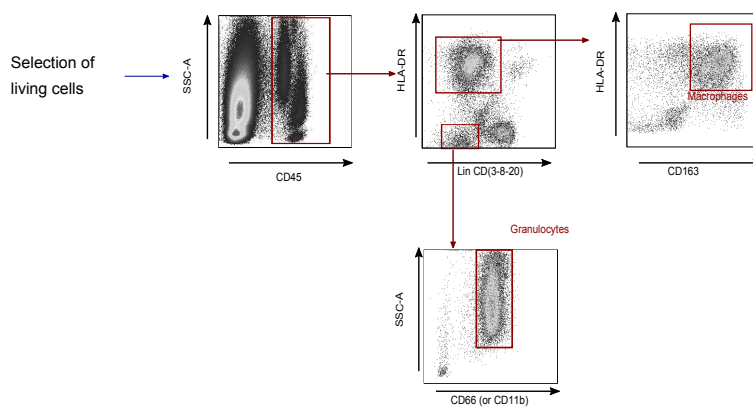

(A) Flow cytometry gating strategy for skin and subcutaneous cells. After doublet and debris exclusion, living cells were selected, and CD45 used to distinguish leukocytes from non-leukocytes. Among CD45<sup>+</sup> cells, granulocytes were first identified by their CD66<sup>+</sup> and SSC-A<sup>+</sup> phenotype. Among CD45<sup>+</sup> CD66<sup>-</sup> cells, lymphocytes were regrouped as one lineage (CD3, CD20)<sup>+</sup>. Macrophages were identified as CD45<sup>+</sup>, Lin (CD3, CD20)<sup>-</sup>, CD66<sup>-</sup>, CD11b<sup>+</sup>, and CD163<sup>+</sup> cells. (B) Flow cytometry gating strategy for muscle cells. After doublet and debris exclusion, living cells were selected, and CD45 used to distinguish leukocytes from non-leukocytes. Among CD45<sup>+</sup> cells, HLA-DR<sup>+</sup> cells were first identified. Among HLA-DR<sup>+</sup> cells, macrophages were regrouped as CD163<sup>+</sup> cells. HLA-DR<sup>-</sup>, lineage (CD3, CD20)<sup>-</sup> and CD66<sup>+</sup> or CD11b<sup>+</sup> cells were considered to be granulocytes.

**Table S1. Panel used for CyTOF staining**

Overview of markers used to identify the CD4<sup>+</sup> and CD8<sup>+</sup> T-cell profiles.

| <b>Metal</b> | <b>Antigen</b>           | <b>Clone</b> | <b>Cytof optimal<br/>μl/well</b> | <b>Supplier(s)</b> | <b>Catalog</b>   |
|--------------|--------------------------|--------------|----------------------------------|--------------------|------------------|
| Nd(146)      | HLA-DR                   | L243 (G46-6) | 0,05                             | BD<br>Biosciences  | 555810           |
| Gd(156)      | CD45RA                   | 5H9          | 0,3                              | BD<br>Biosciences  | 556625           |
| Nd(150)      | <b>CD62L</b>             | SK11         | 0,3                              | BD<br>Biosciences  | 559050           |
| Dy(162)      | CD279 (PD-1)             | EH12.2H7     | 0,5                              | Biolegend          | BLE32990<br>2    |
| Yb(172)      | CD95                     | DX2          | 1,3                              | BD<br>Biosciences  | 555671           |
| Er(168)      | CD195<br>(CCR5)          | 3A9          | 1                                | BD<br>Biosciences  | 556041           |
| Nd(145)      | <b>CD197<br/>(CCR7)</b>  | G043H7       | 1                                | Biolegend          | BLE35320<br>2    |
| Eu(151)      | CD27                     | O323         | 1                                | Biolegend          | BLE30280<br>2    |
| Sm(147)      | CD278<br>(ICOS)          | C398.4A      | 2                                | Biolegend          | BLE31350<br>2    |
| Nd(144)      | CD28                     | CD28.2       | 1,5                              | BD<br>Biosciences  | 555726           |
| Yb(174)      | CD127 (IL-7R)            | eBioRDR5     | 0,7                              | eBiosciences       | 16-1278-82       |
| Sm(152)      | CD185<br>(CXCR5)         | 710D82.1     | 0,7                              | NIH                | 710D82.1         |
| Nd(148)      | <b>GranzymeB</b>         | GB11         | 0,05*                            | Clinisciences      | C112623          |
| Lu(175)      | <b>TNF-α</b>             | MAb11        | 0,5*                             | BD<br>Biosciences  | 559071           |
| Tm(169)      | CD4                      | L200         | 0,2*                             | BD<br>Biosciences  | 550625           |
| Sm(154)      | CD8                      | RPA-T8       | 0,1*                             | BD<br>Biosciences  | 555364           |
| Eu(153)      | <b>CD40L<br/>(CD154)</b> | TRAP1        | 0,2*                             | BD<br>Biosciences  | 555698           |
| Gd(158)      | <b>IFN-γ</b>             | B27          | 0,1*                             | BD<br>Biosciences  | 51-410-<br>20661 |
| Dy(164)      | <b>MIP-1β<br/>(CCL4)</b> | D21-1351     | 0,1*                             | BD<br>Biosciences  | 51-410-<br>23851 |
| Ho(165)      | <b>IL-2</b>              | MQ1-17H12    | 0,1*                             | BD<br>Biosciences  | 51-410-<br>18951 |



|             |               |             |       |                 |              |
|-------------|---------------|-------------|-------|-----------------|--------------|
| Yb(176)     | IL-10         | JES3-9D7    | 0,1*  | Miltenyi Biotec | 130-096-041  |
| Pr(141)     | IL-17         | eBio64DEC17 | 0,1*  | eBiosciences    | 14-7179-82   |
| Gd(160)     | Ki-67         | B56         | 0,2*  | BD Biosciences  | 51-410-36521 |
| Er(167)     | IL-4          | 7A3-3       | 0,2*  | Miltenyi Biotec | 120-000-031  |
| Nd(143)     | CD3           | SP34-2      | 0,3*  | BD Biosciences  | 551916       |
| Tb(159)     | Bcl-2         | Bcl-2/100   | 0,3*  | eBiosciences    | 14-1028-82   |
| Yb(171)     | Perforin      | Pf-344      | 0,2*  | MabTech         | 3465-5-250   |
| Nd(142)     | CD69          | FN50        | 0,1*  | BD Biosciences  | 5555529      |
| Sm(149)     | FoxP3         | 206D        | 0,3*  | Biolegend       | 320102       |
| Ir(191/193) | DNA           | N/A         | 1/500 | DVS Sciences    | 201192A      |
| Rh(103)     | Viability-103 | N/A         | 1/200 | DVS Sciences    | 201103A      |

\*Intracellular staining

Clustering Markers

**Table S2. Panel used for Flow Cytometry staining.**

Overview of markers used to discriminate between immune cells in the blood and tissues.

| <b>Staining</b>                       | <b>Marker</b> | <b>Fluorochrome</b>                      | <b>Clone</b> |
|---------------------------------------|---------------|------------------------------------------|--------------|
| Blood                                 | CD66abce      | FITC                                     | TET2         |
| Blood                                 | CD123         | PerCP                                    | 7G3          |
| Blood                                 | CD11c         | PE-Cy7                                   | 3.9          |
| Blood                                 | CD3           | APCH7                                    | SP34-2       |
| Blood                                 | CD20          | APCH7                                    | 2H7          |
| Blood                                 | CD16          | APC                                      | 3G8          |
| Blood                                 | CD11b         | AF700                                    | Bear 1       |
| Blood                                 | CD14          | V450                                     | M5E2         |
| Blood                                 | HLA-DR        | V500                                     | G46-6        |
| Blood                                 | CD8           | BV650                                    | RPA-T8       |
| Blood                                 | NKG2a         | PE                                       | Z199         |
| Blood                                 | CD33          | PE                                       | AC104.3E3    |
| Skin and subcutaneous cell suspension | CD45          | PerCP-Cy5.5                              | DO58-1283    |
| Skin and subcutaneous cell suspension | CD66abce      | APC                                      | TET2         |
| Skin and subcutaneous cell suspension | CD163         | BV711                                    | GHI/61       |
| Skin and subcutaneous cell suspension | CD3           | V450                                     | SP34-2       |
| Skin and subcutaneous cell suspension | CD20          | V450                                     | 2H7          |
| Skin and subcutaneous cell suspension | CD16          | APC                                      | 3G8          |
| Skin and subcutaneous cell suspension | CD11b         | PE-Cy7                                   | Bear 1       |
| Muscle cell suspension                | CD45          | PerCP                                    | DO58-1283    |
| Muscle cell suspension                | HLA-DR        | APC-H7                                   | G46-6        |
| Muscle cell suspension                | CD3           | V450                                     | SP34-2       |
| Muscle cell suspension                | CD8           | V450                                     | RPA-T8       |
| Muscle cell suspension                | CD20          | V450                                     | 2H7          |
| Muscle cell suspension                | CD66abce      | FITC                                     | TET2         |
| Muscle cell suspension                | CD11b         | PE-Cy7                                   | Bear 1       |
| Muscle cell suspension                | CD163         | AF700<br>(Zenon labelling kit<br>(Life)) | GHI/61       |

**Table S3. Dataset of innate immune response.**

**(File sent in separately)**

Overview of innate parameters used to perform the integrative analyses. Primary data for each cell population are expressed in percentage among CD45<sup>+</sup> cells. Cell populations and gene expression are then expressed as the ratio between value at 24h after MVA injection and untreated condition.
